# Supplementary material
Source: publisher site journal article supplement (https://static.cambridge.org/content/id/urn:cambridge.org:id:article:S0899823X1900076X/resource/name/S0899823X1900076Xsupp001.docx)
Supplement: Supplementary file 1 [file S0899823X1900076Xsupp001.docx]

Online Table 1. Tuberculin skin test and interferon gamma release assay results at diagnosis by healthcare personnel status and among healthcare personnel with tuberculosis in the United States, January 2010–December 2016

|  | Healthcare personnel (HCP) with TB  (n = 2,460) | |  |  |
| --- | --- | --- | --- | --- |
| Characteristic | Non-U.S.-born  (N = 1,833)  n (%) | U.S.-born  (N = 627)  n (%) | Odds Ratio  (95% CI) a | P-value b |
| TST/IGRA test result  TST positive / IGRA positive  TST negative / IGRA positive  TST positive / IGRA negative  TST negative / IGRA negative  TST not done, unknown / IGRA positive  TST not done, unknown / IGRA negative  TST positive / IGRA not done, unknown, indeterminate  TST negative / IGRA not done, unknown, indeterminate  TST not done, unknown / IGRA not done, unknown, indeterminate | 158 (9)  26 (1)  31 (2)  3 (< 1)  539 (29)  63 (3)  516 (28)  49 (3)  448 (24) | 73 (12)  12 (2)  10 (2)  17 (3)  147 (23)  27 (4)  186 (30)  37 (6)  118 (19) | Reference  1.00 (0.48–2.09)  1.43 (0.67–3.08)  0.08 (0.02–0.30)  1.69 (1.22–2.36)  1.08 (0.64–1.83)  1.28 (0.93–1.77)  0.61 (0.37–1.02)  1.75 (1.24–2.47) | > 0.9999  0.4643  < 0.0001  0.0028  0.8912  0.1577  0.0790  0.0020 |
| NOTE. Data are number (#) or proportion (%) of persons with TB, unless otherwise indicated.  TB, tuberculosis; TST, tuberculin skin test; IGRA, interferon gamma release assay; HCP, healthcare personnel.  a Unadjusted odds ratios and 95% confidence intervals (CI) comparing non-U.S.-born HCP vs U.S.-born HCP.  b P-values and confidence intervals were calculated using Fisher’s exact test when cell sizes were <5. | | | | |
